# Supplementary material for: The influence of PEGylated gold nanoparticles on the solidification of alcohols
Source: Royal Society of Chemistry journal article supplement (doi:10.1039/d4tc00358f), 2024-01-01
Supplement: d4tc00358f1.pdf [file d4tc00358f1.pdf]

## Supporting Information

### The influence of PEGylated gold nanoparticles on the solidification of alcohols

Camino Martín-Sánchez<sup>a,b\*</sup>, Ana Sánchez-Iglesias<sup>c,d</sup>, José Antonio Barreda-Argüeso<sup>a</sup>, Jesús González<sup>a</sup>, Fernando Rodríguez<sup>a</sup>

<sup>a</sup> MALTA Consolider, DCITIMAC, Facultad de Ciencias, University of Cantabria, Av. Los Castros 48, Santander, 39005, Spain

<sup>b</sup> Faculté des Sciences, Département de Chimie Physique, Université de Genève, 30 Quai Ernest-Ansermet, CH-1211 Genève, Switzerland

<sup>c</sup> CIC biomaGUNE, Basque Research and Technology Alliance (BRTA), Paseo de Miramón 194, Donostia-San Sebastián, 20014, Spain

<sup>d</sup> Centro de Física de Materiales (CISC-UPV/EHU), Paseo Manuel de Lardizabal 5, 20018 Donostia-San Sebastián, Spain

## Supporting Information content:

- (1) Hydrostatic limits of the  $d = 20$  nm AuNS EtOH and  $d = 12$  and 28 nm AuNS MeOH-EtOH 4:1 colloids.

**Table S1.** Hydrostatic limits of  $d = 20$  nm AuNS EtOH colloid for the different gold molar concentrations. Errors correspond to the standard deviations derived from the three runs for each molar concentration.

| [Au] (mM) | $P_{h,1}$ (GPa) | $P_{h,2}$ (GPa) | $P_{h,3}$ (GPa) | $\langle P_h \rangle$ (GPa) | $\Delta P_h$ (GPa) |
|-----------|-----------------|-----------------|-----------------|-----------------------------|--------------------|
| 0         | 3.7             | 3.6             | 3.6             | <b>3.6</b>                  | <b>0.1</b>         |
| 2.6       | 3.2             | 3.2             | 3.3             | <b>3.3</b>                  | <b>0.1</b>         |
| 5.2       | 3.0             | 3.2             | 3.1             | <b>3.1</b>                  | <b>0.1</b>         |
| 7.7       | 2.9             | 3.0             | 2.6             | <b>2.8</b>                  | <b>0.2</b>         |
| 10.4      | 2.5             | 2.9             | 2.6             | <b>2.7</b>                  | <b>0.2</b>         |

**Table S2.** Hydrostatic limits of  $d = 12$  nm AuNS MeOH-EtOH 4:1 colloid for different gold molar concentrations. Errors correspond to the standard deviations derived from the three runs for each molar concentration.

| [Au] (mM) | $P_{h,1}$ (GPa) | $P_{h,2}$ (GPa) | $P_{h,3}$ (GPa) | $\langle P_h \rangle$ (GPa) | $\Delta P_h$ (GPa) |
|-----------|-----------------|-----------------|-----------------|-----------------------------|--------------------|
| 0         | 11.1            | 10.8            | 10.8            | <b>10.9</b>                 | <b>0.2</b>         |
| 3.2       | 10.0            | 10.6            | 10.5            | <b>10.4</b>                 | <b>0.3</b>         |
| 6.4       | 10.4            | 9.9             | 9.8             | <b>10.0</b>                 | <b>0.3</b>         |
| 12.7      | 9.2             | 9.2             | 9.1             | <b>9.2</b>                  | <b>0.1</b>         |

**Table S3.** Hydrostatic limits of  $d = 28$  nm AuNS MeOH-EtOH 4:1 colloid for different gold molar concentrations. Errors correspond to the standard deviations derived from the three runs for each molar concentration.

| [Au] (mM) | $P_{h,1}$ (GPa) | $P_{h,2}$ (GPa) | $P_{h,3}$ (GPa) | $\langle P_h \rangle$ (GPa) | $\Delta P_h$ (GPa) |
|-----------|-----------------|-----------------|-----------------|-----------------------------|--------------------|
| 0         | 11.1            | 10.8            | 10.8            | <b>10.9</b>                 | <b>0.2</b>         |
| 2.5       | 10.3            | 10.6            | 10.4            | <b>10.4</b>                 | <b>0.2</b>         |
| 5.0       | 10.6            | 10.0            | 10.0            | <b>10.2</b>                 | <b>0.2</b>         |
| 7.4       | 9.4             | 10              | 9.8             | <b>9.7</b>                  | <b>0.3</b>         |
| 9.9       | 9.6             | 9.6             | 9.0             | <b>9.4</b>                  | <b>0.2</b>         |

- (2) Variation of the number of PEG-SH molecules at the surface of AuNS with its diameter.

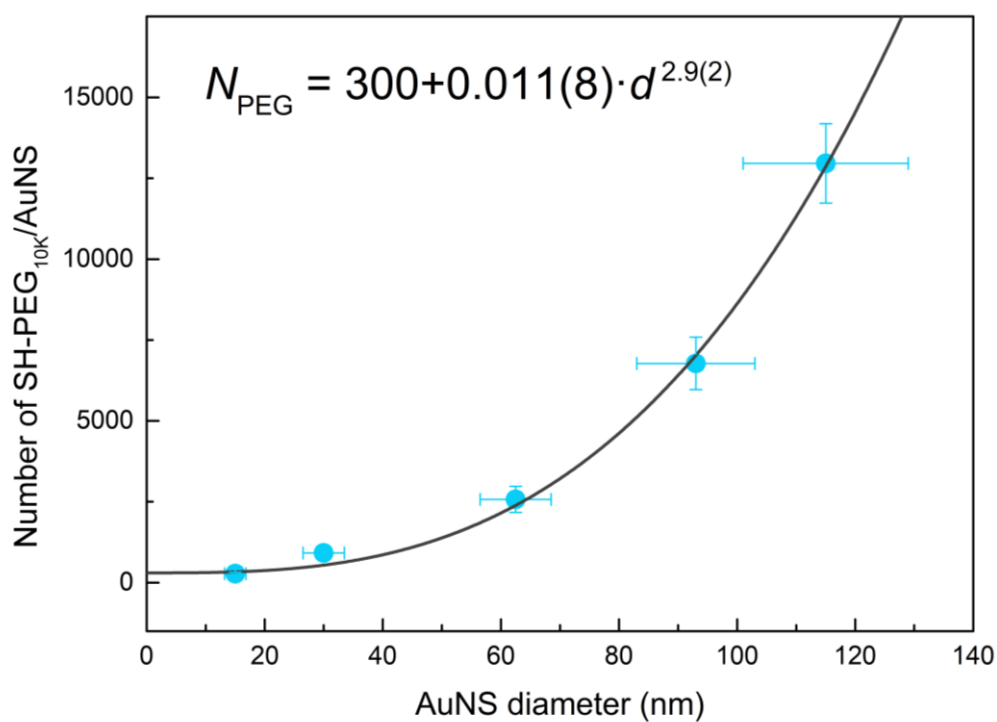

**Figure S1.** Variation of the number of PEG<sub>10K</sub>-SH molecules as a function of the nanosphere diameter. Filled circles correspond to previously reported experimental data by Rahme *et al.* [1]. Solid line corresponds to the fitting of the data to the equation indicated on figure.

(3) EtOH Raman spectroscopy measurements.

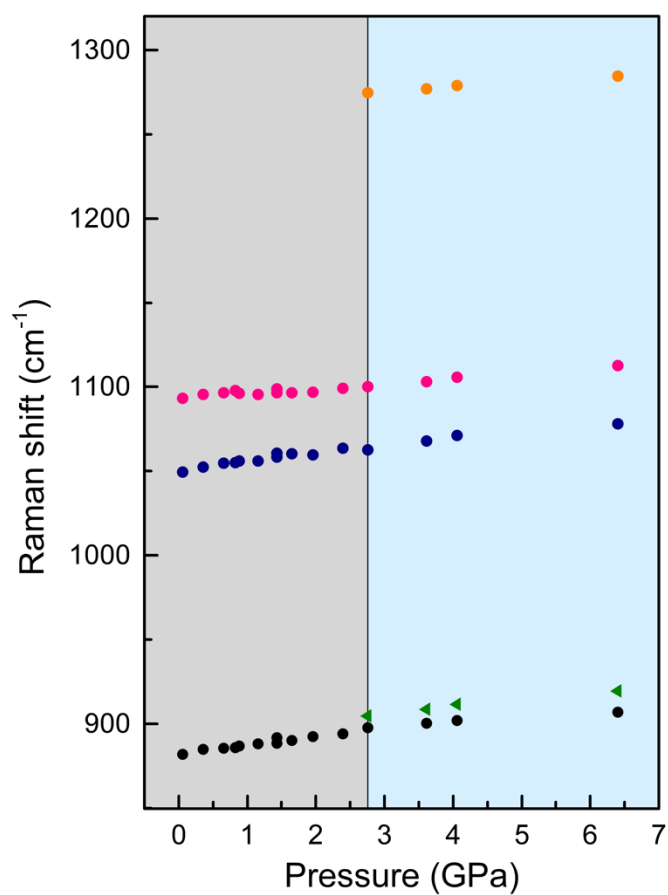

**Figure S2.** Variation of different Raman vibrational frequencies of ethanol with pressure at room-temperature. Note the early crystallization of EtOH at 2.8 GPa due to the application of pressure without stabilization time between steps.

- (4) Confidence ellipses in  $K_0$  and  $K'_0$  parameter space for the EtOH EOS fits.

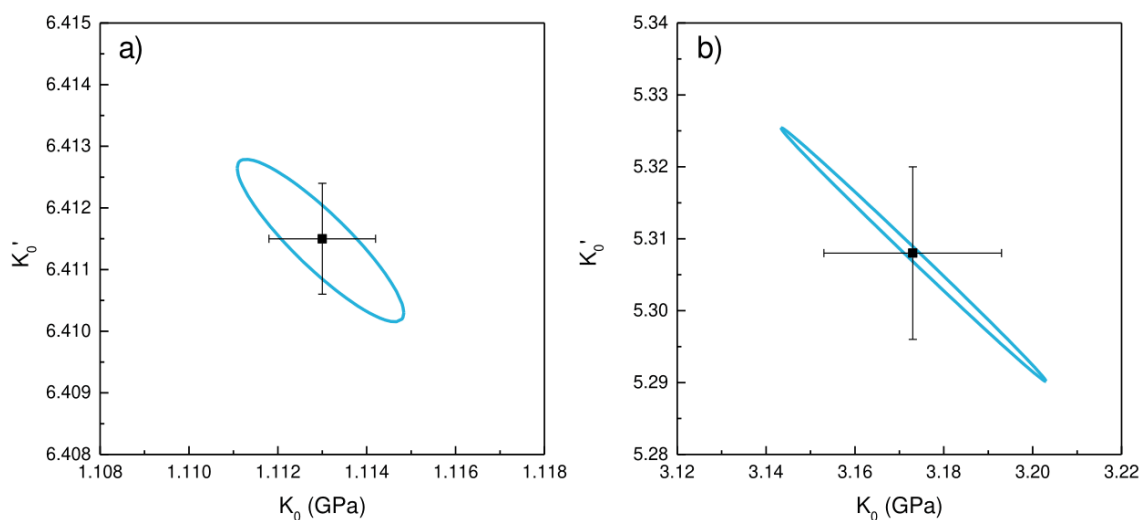

**Figure S3.** Confidence ellipses in  $K_0$  and  $K'_0$  parameter space for the a) liquid and b) crystalline phases of EtOH obtained through EOS EosFit7-GUI [2], using a third-order Murnaghan EOS [3] and third-order Birch-Murnaghan EOS [4] for the liquid and crystalline phases, respectively.

## References

- [1] Rahme, K.; Chen, L.; Hobbs, R. G.; Morris, M. A.; O'Driscoll, C.; Holmes, J. D. PEGylated gold nanoparticles: polymer quantification as a function of PEG lengths and nanoparticle dimensions. *RSC Adv.* **2013**, 3, 6085-6094.
- [2] Gonzalez-Platas, J.; Alvaro, M.; Nestola, F.; Angel, R. EosFit7-GUI: a new graphical user interface for equation of state calculations, analyses and teaching. *J. App. Cryst.* **2016**, 49, 1377-1382.
- [3] Murnaghan, F. D. The compressibility of media under extreme pressures. *Proc. Natl. Acad. Sci. U.S.A.* **1944**, 30, 244-247.
- [4] Birch, F. Finite elastic strain of cubic crystals. *Phys. Rev.* **1947**, 71, 809.
